# Supplementary material for: Development and Evaluation of Thermosensitive Hydrogels with Binary Mixture of Scutellariae baicalensis radix Extract and Chitosan for Periodontal Diseases Treatment
Source: MDPI journal article supplement (doi:10.3390/ijms222111319), 2021-10-20
Supplement: s1 [file s1]

## Supplementary material

**Table S1.** Validation parameters of the flavones determination by the UHPLC-DAD method.

| Parameter                                                                           | Baicalin               | Baicalein            | Wogonin                           |
|-------------------------------------------------------------------------------------|------------------------|----------------------|-----------------------------------|
| Linearity: $y = ax + b$                                                             | $y = 0.2536x - 0.7974$ | $y = 0.472 - 2.6637$ | $y = 0.3408x$                     |
| $a \pm S_a$                                                                         | $0.2536 \pm 0.009$     | $0.472 \pm 0.0036$   | $0.3408 \pm 0.0017$               |
| $b \pm S_b$                                                                         | $-0.7974 \pm 0.1383$   | $-2.6637 \pm 0.5401$ | insignificant ( $\alpha = 0.05$ ) |
| correlation coefficient (r)                                                         | 1.0000                 | 0.9999               | 0.9999                            |
| Limit of detection (LOD):<br>LOD = $3 \text{ SD}/a$ ( $\mu\text{g mL}^{-1}$ )       | 2.42                   | 5.07                 | 3.70                              |
| Limit of quantification<br>(LOQ): LOQ = $10 \text{ SD}/a$ ( $\mu\text{g mL}^{-1}$ ) | 7.32                   | 15.36                | 11.22                             |
| Range of linearity ( $\mu\text{g mL}^{-1}$ )                                        | 10–250                 | 10–250               | 10–250                            |
| Precision, RSD                                                                      |                        |                      |                                   |
| 50 [ $\mu\text{g mL}^{-1}$ ]                                                        | 0.9092                 | 0.4488               | 0.7388                            |
| 100 [ $\mu\text{g mL}^{-1}$ ]                                                       | 1.4755                 | 1.3150               | 0.8626                            |
| 150 [ $\mu\text{g mL}^{-1}$ ]                                                       | 1.2758                 | 1.1209               | 0.5473                            |
| Intra-day, RSD                                                                      |                        |                      |                                   |
| 50 [ $\mu\text{g mL}^{-1}$ ]                                                        | 1.9967                 | 1.7808               | 1.4532                            |
| 100 [ $\mu\text{g mL}^{-1}$ ]                                                       | 1.2791                 | 1.9548               | 2.4567                            |
| 150 [ $\mu\text{g mL}^{-1}$ ]                                                       | 1.1350                 | 1.1504               | 3.6224                            |
| Retention time (min)                                                                | 30.95                  | 47.36                | 60.41                             |

$S_a$  standard deviation of slope;  $S_b$  standard deviation of intercept, t calculated values of the Student's t test,  $t_{\alpha, f} = 2.571$  critical values of the Student's t test for degrees of freedom  $f = 5$  and significance level  $\alpha = 0.05$ .

**Table S2.** The drug flux and the average cumulative amount per area during dissolution studies of formulations with binary mixture of *S. baicalensis radix* lyophilized extract and chitosan.

|                  | Drug Flux<br>( $J_{ss}$ )<br>[ $\mu\text{g cm}^{-2}\text{h}^{-1}$ ] | b                | Correlation<br>Coefficient (r) | Release<br>Coefficient<br>( $k_r$ ) [ $\text{cm h}^{-1}$ ] | Average Cumulative<br>Amount<br>Per Area at 6 h ( $Q_{6h}$ )<br>[ $\mu\text{g cm}^{-1}$ ] |
|------------------|---------------------------------------------------------------------|------------------|--------------------------------|------------------------------------------------------------|-------------------------------------------------------------------------------------------|
| <b>Baicalin</b>  |                                                                     |                  |                                |                                                            |                                                                                           |
| F1-2             | $8.29 \pm 0.14$                                                     | $22.33 \pm 0.36$ | $0.999 \pm 0.000$              | $2.37 \pm 0.01$                                            | $71.69 \pm 1.30$                                                                          |
| F1-4             | $11.55 \pm 0.39$                                                    | $20.31 \pm 0.24$ | $0.999 \pm 0.000$              | $1.62 \pm 0.05$                                            | $89.38 \pm 2.00$                                                                          |
| F2-2             | $6.44 \pm 0.51$                                                     | $22.81 \pm 0.30$ | $0.995 \pm 0.004$              | $1.78 \pm 0.19$                                            | $60.75 \pm 2.99$                                                                          |
| F2-4             | $8.74 \pm 1.88$                                                     | $19.15 \pm 0.62$ | $0.985 \pm 0.018$              | $1.23 \pm 0.26$                                            | $72.64 \pm 10.45$                                                                         |
| <b>Baicalein</b> |                                                                     |                  |                                |                                                            |                                                                                           |
| F1-2             | $7.09 \pm 0.10$                                                     | $43.69 \pm 0.07$ | $0.995 \pm 0.001$              | $5.62 \pm 0.08$                                            | $85.62 \pm 0.64$                                                                          |
| F1-4             | $7.95 \pm 0.15$                                                     | $43.56 \pm 0.09$ | $0.996 \pm 0.000$              | $3.16 \pm 0.06$                                            | $90.65 \pm 0.86$                                                                          |
| F2-2             | $7.07 \pm 0.04$                                                     | $43.75 \pm 0.04$ | $0.995 \pm 0.000$              | $5.61 \pm 0.03$                                            | $85.63 \pm 0.25$                                                                          |
| F2-4             | $7.75 \pm 0.10$                                                     | $43.59 \pm 0.07$ | $0.999 \pm 0.000$              | $3.07 \pm 0.04$                                            | $89.60 \pm 0.47$                                                                          |
| <b>Wogonin</b>   |                                                                     |                  |                                |                                                            |                                                                                           |
| F1-2             | $0.09 \pm 0.01$                                                     | $-0.06 \pm 0.01$ | $0.981 \pm 0.007$              | $0.17 \pm 0.02$                                            | $0.44 \pm 0.06$                                                                           |
| F1-4             | $0.17 \pm 0.08$                                                     | $-0.13 \pm 0.08$ | $0.985 \pm 0.002$              | $0.17 \pm 0.08$                                            | $0.88 \pm 0.44$                                                                           |
| F2-2             | $0.11 \pm 0.00$                                                     | $-0.09 \pm 0.00$ | $0.975 \pm 0.006$              | $0.21 \pm 0.00$                                            | $0.59 \pm 0.02$                                                                           |
| F2-4             | $0.19 \pm 0.03$                                                     | $-0.10 \pm 0.05$ | $0.963 \pm 0.010$              | $0.19 \pm 0.03$                                            | $1.10 \pm 0.14$                                                                           |

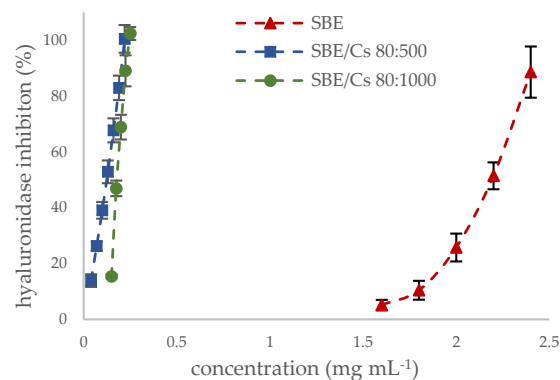

**Figure S1.** The plot presenting inhibition activity of *S. baicalensis radix* extract and binary mixtures toward hyaluronidase enzyme (mean  $\pm$  S.D.,  $n = 6$ ).

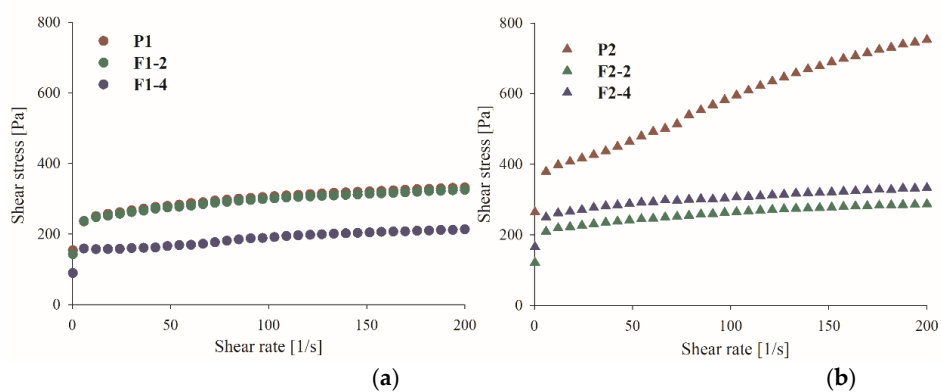

**Figure S2.** The flow curves of (a) the gel samples without and (b) after addition of the SBE/Cs 80:500.

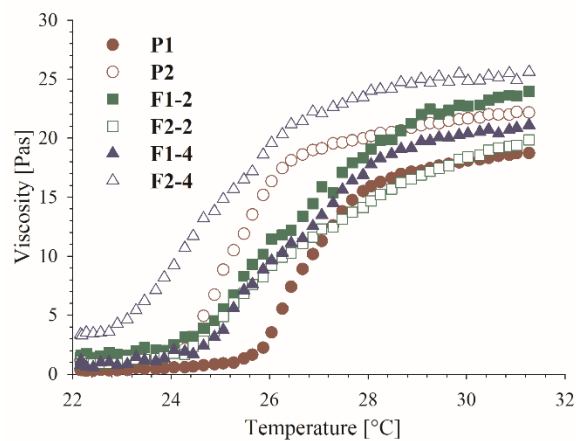

**Figure S3.** The temperature sweeping of the gel samples.

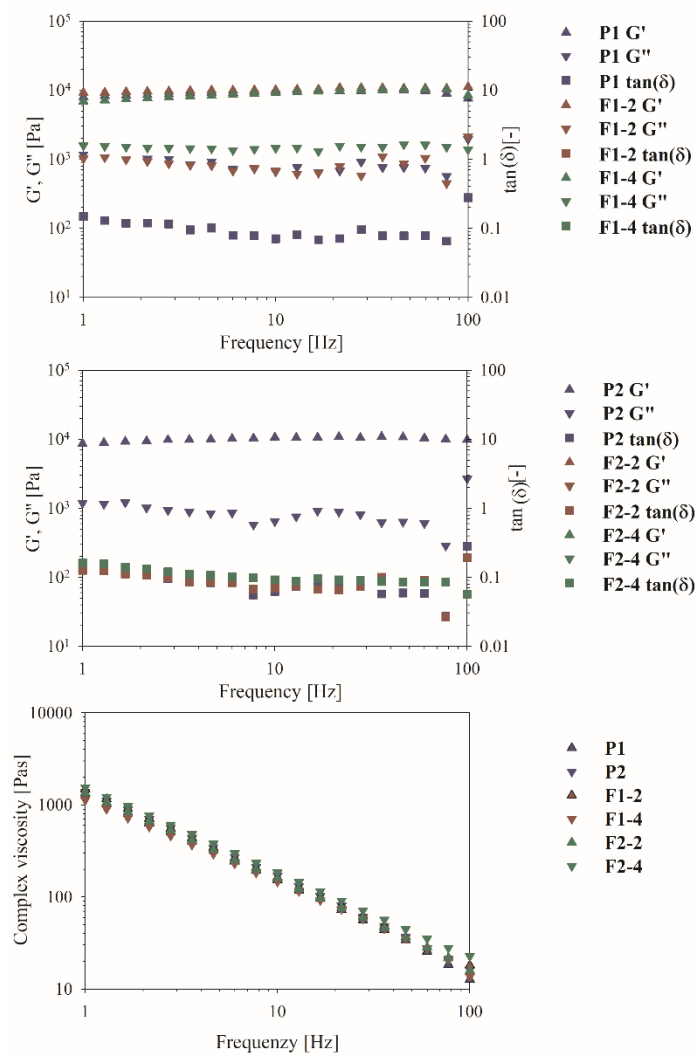

**Figure S4.** The oscillatory frequency sweeping of the gel samples.
